# Supplementary material for: Direct-Continuous Preparation of Nanostructured Titania-Silica Using Surfactant-Free Non-Scaffold Rice Starch Template
Source: Nanomaterials (Basel). 2018 Jul 10;8(7):514. doi: 10.3390/nano8070514 (PMC6071009; doi:10.3390/nano8070514)
Supplement: Supplementary file 1 [file nanomaterials-08-00514-s001.pdf]

## Supplementary materials

# Direct-Continuous Preparation of Nanostructured Titania-Silica using Surfactant-Free Non-Scaffold Rice Starch Template

Juan Matmin<sup>1,2,\*</sup>, Irwan Affendi<sup>1</sup> and Salasiah Endud<sup>3</sup>

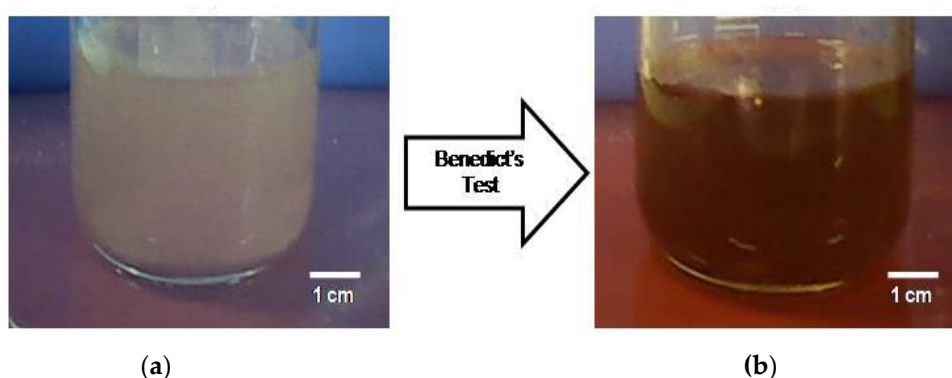

**Figure S1.** Benedict's test (a) Hydrolysis of rice starch (HRS in dark pale); and (b) HRS on Benedict's solution (Brick's red).

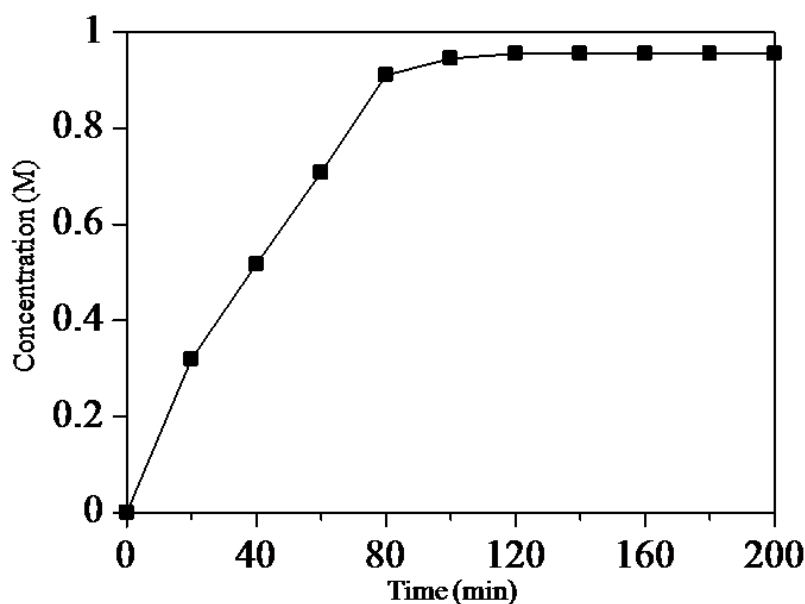

**Figure S2.** Spectrophotometric determination of Benedict's solution.

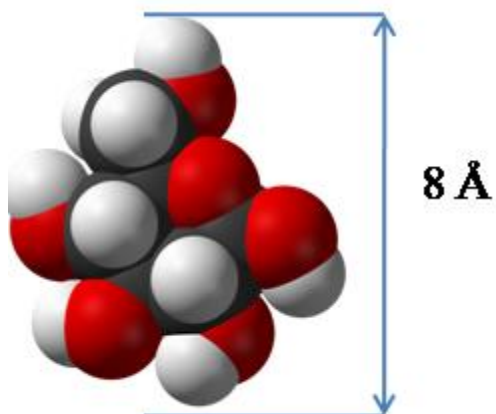

**Figure S3.** Molecular-sized based on computer assisted modeling of molecular mechanics-2 (MM2) modeling of D-glucose.

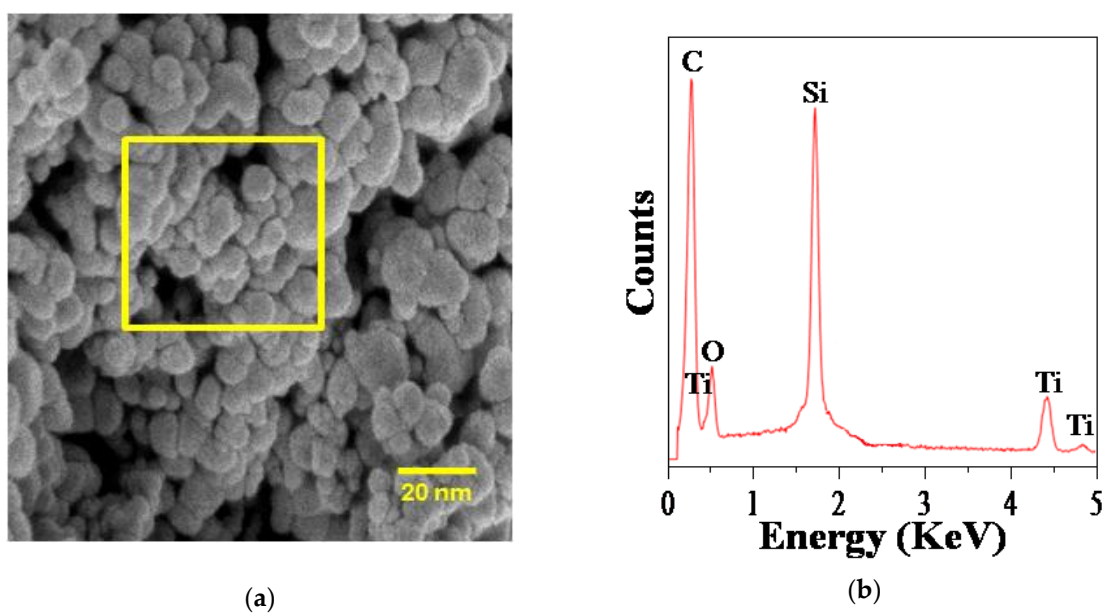

**Figure S4.** Field emission scanning electron microscopy with energy dispersive X-ray (FESEM-EDX) measurements (a) Micrograph of selected image; and (b) Energy dispersive X-ray (EDX) spectrum collected from (1)Ti-SiNS.
